# Supplementary material for: Deep Learning–Based Multi-Omics Integration Robustly Predicts Survival in Liver Cancer
Source: Oxford University Press journal article supplement (doi:10.1158/1078-0432.ccr-17-0853), 2017-10-05
Supplement: 10780432ccr170853-sup-180979_3_supp_4273548_qwcw41.xlsx [file 10780432ccr170853-sup-180979_3_supp_4273548_qwcw41.xlsx]

## Sheet: Table S1
Supplementary Table S1: Clinical Characteristics of the HCC cohorts used in this study.
(A) Clinical summary of TCGA HCC Samples (n=360).			(B) Clinical summary of LIRI-JP cohort (n=230).				(C) Clinical summary of NCI (GSE14520) cohort (n=221)					(D) Clinical summary of E-TABM-36 cohort (n=40).				(E) Clinical summary of Hawaiian cohort (n=27).
Characteristics	Patients 360 (100%)		Age	Median	S.D.		Age		Median	S.D.		Age(years)	Median	S.D.		Age(years)	Median	S.D.
Age	59.6 +- 13.2			68	10.1248				50	10.6			67	15.21			67	9.48
Gender			Gender	Samples	%age		Gender			%age		Gender	Samples	%age		Gender	Samples	%age
Female	114 (31.7%)		Female	60	26.087			Female	30	13.5747		Female	8	20		Female	7	25.93
Male	246 (68.3%)		Male	170	73.913			Male	191	86.4253		Male	32	80		Male	20	74.07
Stage			Stage				Stage			%age		HBV				Stage
Stage I	167 (46.4%)		1	35	15.2174			1	93	42.0814		High titer	5	12.5		1	18	66.67
Stage II	86 (23.9%)		2	105	45.6522			2	77	34.8416		Low titer	5	12.5		2	3	11.11
Stage III	79 (22.9%)		3	71	30.8696			3	49	22.1719		Negative	30	75		3	0	0
Stage IV	6 (1.67%)		4	19	8.26087		HBV.viral.status	AVR-CC	56	25.3394		Survival	#	%age		4	1	3.7
Grade			Survival	Censored	%age			CC	156	70.5882		Censored	21/40	52.5		NA	5	18.52
Grade 1	52 (14.4%)		Overall	43/230	18.6957			N	6	2.71493		Dead	19/40	47.5		Survival	#	%age
Grade 2	171 (47.5%)			Median	S.D.		Survival		Censored	%age			Median	S.D.		Censored	18/27	66.67
Grade 3	121(33.6%)		Overall	780	418.352			Overall	85/221	38.4615		Overall (days)	1065	606.83		Dead	43005	33.33
Grade 4	12 (3.33%)								Median	S.D.							Median	S.D.
Race								Overall	52.3	21.5799						Overall (days)	1247	631.39
White	176 (48.9%)						Predicted.risk.Metastasis.Signature			%age
Asian	155 (43.1%)							High	107	48.4163
African American	17 (4.72%)							Low	114	51.5837
American Indian or Alaska Native	2 (0.56%)
Risk factors
HBV	74 (20.6%)
HCV	31 (8.61%)
Alcohol	67 (18.6%)
Alcohol & HBV	20 (5.56%)
Alcohol & HCV	14 (3.89%)
Fatty Liver Disease	10 (2.78%)
No Primary risk	85 (23.6%)
Others	59 (16.4%)
Survival status
Overall Survival	median=586
censored	236/360 (65.5%)
