# Supplementary material for: Deep Learning–Based Multi-Omics Integration Robustly Predicts Survival in Liver Cancer
Source: Oxford University Press journal article supplement (doi:10.1158/1078-0432.ccr-17-0853), 2017-10-05
Supplement: 10780432ccr170853-sup-180979_3_supp_4273549_ywcw41.xlsx [file 10780432ccr170853-sup-180979_3_supp_4273549_ywcw41.xlsx]

## Sheet: Table_S2
Supplementary Table S2: ANOVA-based top features from three omics: mRNA (100), miR (50) and methylation (50).
mRNA_Features	p-value	miR_Features	p-value	Methylation_Features	p-value
BZW2	1.05176e-26	hsa-mir-27a	1.08511e-13	SNORD44	1.10683e-19
ALB	3.16539e-25	hsa-mir-23a	5.55429e-13	S100A2	2.65511e-19
KNG1	6.02919e-25	hsa-mir-21	9.83671e-13	SNORD78	3.31125e-19
SMYD5	5.75055e-24	hsa-mir-132	6.09024e-12	SNORD22	3.31396e-19
MTMR2	9.87759e-24	hsa-mir-212	6.49142e-11	FLJ13224	3.65135e-19
ANXA2	6.02006e-23	hsa-mir-99a	7.08699e-11	SNORD12	5.43005e-19
HSD17B6	9.20397e-23	hsa-mir-22	8.15779e-10	GAS5	2.1918e-18
STARD3NL	2.29818e-22	hsa-mir-139	2.19302e-09	ZFAS1	3.00787e-18
ATIC	8.29385e-22	hsa-mir-125b-2	2.26294e-09	SNORD12B	5.68612e-18
METTL7A	1.32061e-21	hsa-mir-582	2.3854e-09	SNORD79	1.20185e-17
UPB1	1.505e-21	hsa-mir-122	2.52758e-09	SNORD31	1.79694e-17
CBX3	1.52978e-21	hsa-mir-149	3.94221e-09	ACOX2	2.12915e-17
ABCC6	1.62521e-21	hsa-let-7e	5.24614e-09	SNORD80	8.26648e-17
TEAD4	3.74849e-21	hsa-mir-24-2	7.35602e-09	SNORD99	1.5567e-16
MARC2	3.95629e-21	hsa-mir-194-2	1.21093e-08	SNORA71B	1.63425e-16
PGRMC1	4.26067e-21	hsa-mir-125b-1	1.45198e-08	SNORD77	1.82256e-16
ALDOA	6.6669e-21	hsa-mir-194-1	1.65623e-08	SNORD30	1.97266e-16
S100A11	7.56406e-21	hsa-mir-148a	1.95279e-08	SNORD76	3.73373e-16
TAX1BP3	8.2271e-21	hsa-mir-200a	2.26539e-08	FITM1	4.01338e-16
PNMA1	9.11212e-21	hsa-mir-200b	2.82581e-08	SERPINC1	5.70099e-16
GC	9.2205e-21	hsa-let-7c	3.39146e-08	SNHG1	6.47618e-16
ACSM2A	1.85276e-20	hsa-mir-92b	6.81257e-08	SNORD32A	1.11048e-15
ACOX2	2.4139e-20	hsa-mir-877	7.92706e-08	SNORD47	2.49443e-15
DCAF11	2.72704e-20	hsa-mir-885	8.34475e-08	SNORD81	2.49443e-15
SERPIND1	2.7524e-20	hsa-mir-100	9.22853e-08	RTP3	5.22471e-15
MFSD10	3.32881e-20	hsa-mir-101-1	1.21443e-07	KNG1	5.54717e-15
CAT	3.65386e-20	hsa-mir-769	2.01042e-07	SNORD34	9.04541e-15
PON1	3.67735e-20	hsa-mir-99b	2.29896e-07	SNORD35A	9.88992e-15
MED15	3.96e-20	hsa-mir-192	2.65879e-07	RPS18	1.90341e-14
GLYATL1	4.34915e-20	hsa-mir-421	3.95798e-07	SNORD38A	2.44595e-14
PIPOX	4.55902e-20	hsa-mir-2355	5.89861e-07	SNORD33	2.50612e-14
ARMC9	4.82881e-20	hsa-mir-760	3.50307e-06	BAK1	2.98521e-14
PCK2	6.1237e-20	hsa-mir-125a	4.46567e-06	SNORD75	3.75342e-14
DBN1	8.09099e-20	hsa-mir-181c	6.06594e-06	RPL13A	4.22974e-14
AGXT	1.06014e-19	hsa-mir-101-2	6.14648e-06	RPL13AP5	4.22974e-14
SMIM14	1.07352e-19	hsa-mir-744	7.82251e-06	SNORA61	4.80743e-14
PRMT2	1.70418e-19	hsa-mir-324	8.53576e-06	TTC36	4.90475e-14
SLC6A1	1.7787e-19	hsa-mir-942	9.59609e-06	RPS8	4.90758e-14
RCC2	2.03815e-19	hsa-mir-940	9.67656e-06	ZBTB37	6.42094e-14
BDH1	2.40568e-19	hsa-mir-378c	1.29183e-05	RHOT1	6.67987e-14
ABCG8	2.53232e-19	hsa-mir-429	1.61583e-05	PHYHD1	6.71609e-14
VASP	3.17441e-19	hsa-mir-3677	1.74652e-05	F12	7.34615e-14
MTHFD1L	4.28454e-19	hsa-mir-301a	2.41666e-05	APOC2	7.35577e-14
PI4K2B	4.70658e-19	hsa-mir-183	2.76832e-05	SNORD100	7.60946e-14
TCOF1	5.26334e-19	hsa-mir-598	3.25108e-05	CNTN2	8.93102e-14
PLEKHB2	5.40235e-19	hsa-mir-146a	3.32672e-05	APOC4	9.8222e-14
SLC31A1	5.86148e-19	hsa-mir-642a	3.67751e-05	MIR641	1.00524e-13
TEAD2	6.25188e-19	hsa-mir-1180	4.05826e-05	SNORA51	1.06434e-13
CTAGE5	6.44895e-19	hsa-mir-1301	7.00378e-05	SNORD36A	1.60147e-13
CIDEB	6.78026e-19	hsa-mir-193a	7.8987e-05	SNORA68	1.73213e-13
UBE2Z	6.84054e-19
EHHADH	6.86673e-19
UCK2	8.4682e-19
ITIH1	8.54341e-19
HMGA1	8.84774e-19
TRIP10	8.97344e-19
GIT1	9.52037e-19
TTLL1	1.09597e-18
PKM	1.57882e-18
HAO1	1.78417e-18
LPCAT4	1.81111e-18
SEPSECS	1.84178e-18
CEP89	1.98061e-18
CGNL1	2.14898e-18
ABAT	2.18121e-18
CCT6A	2.79425e-18
C8B	2.79914e-18
ISOC1	2.93301e-18
SERPINC1	3.05319e-18
HDDC2	3.48756e-18
SLC52A2	3.72568e-18
EIF3D	4.53877e-18
RRP12	4.79002e-18
SMTN	4.9177e-18
G6PD	5.06861e-18
TPD52L2	6.39762e-18
ACSM2B	6.5676e-18
PEBP1	8.07819e-18
WDR75	9.67384e-18
MAPRE1	9.88404e-18
TM4SF1	1.01818e-17
PLXNA1	1.09123e-17
CERS5	1.19393e-17
ANXA2P2	1.21988e-17
ALDH5A1	1.3542e-17
SLC27A2	1.66541e-17
CYB5A	1.86727e-17
DBNDD2	3.0581e-17
GYG1	3.38657e-17
HMGCS2	3.72067e-17
CLIC1	4.00005e-17
SSB	4.32658e-17
STX6	5.03527e-17
CHMP3	5.43284e-17
KLKB1	5.47521e-17
CTBP2	5.54637e-17
NAP1L1	6.64866e-17
TFR2	7.53302e-17
SAR1B	8.38026e-17
HOMER3	8.42779e-17
