# Supplementary material for: Deep Learning–Based Multi-Omics Integration Robustly Predicts Survival in Liver Cancer
Source: Oxford University Press journal article supplement (doi:10.1158/1078-0432.ccr-17-0853), 2017-10-05
Supplement: 10780432ccr170853-sup-180979_3_supp_4273550_pwcw41.xlsx [file 10780432ccr170853-sup-180979_3_supp_4273550_pwcw41.xlsx]

## Sheet: Table S3
Supplementary Table S3: Performance for cross-validation and for the confirmation cohorts when using alternative approaches, different normalizations and different hyper-parameter values.
							cross-validation (10CV)
		Epoch	Additional hidden layer shape1	Bottleneck layer shape2	Normalization	Experiment	3-omic C-index3	3-omic p-value4	RNA C-index	RNA p-value	MIR C-index	MIR p-value	METH C-index	METH p-value
	Used hyper-parameters	10	500	100	mad + scale	DL	0.69 (0.09)	0.006	0.69 (0.06)	0.008	0.70 (0.04)	0.008	0.64 (0.07)	0.08
	Hidden layers	10	-	100	mad + scale	DL	0.71 (0.06)	0.003	0.71 (0.06)	0.003	0.68(0.008)	0.004	0.63 (0.07)	0.1
		10	500, 250,	100	mad + scale	DL	0.69 (0.071)	0.008	0.70 (0.005)	0.001	0.71 (0.07)	0.001	0.65 (0.07)	0.03
		10	500, 250, 125	100	mad + scale	DL	0.67 (0.06)	0.027	0.66 (0.04)	0.05	0.69 (0.08)	0.006	0.66 (0.06)	0.07
	Alternative approaches5	N/A	N/A	37(6)	mad + scale	CoxPH	0.67 (0.03)	0.007	0.72 (0.11)	0.004	0.66 (0.07)	0.08	0.72 (0.09)	0.01
		N/A	N/A	100	mad + scale	PCA	0.62 (0.07)	0.12	0.60 (0.07)	0.15	0.62 (0.07)	0.07	0.60 (0.07)	0.19
	Number of epochs	1	500	100	mad + scale	DL	0.68 (0.02)	0.06	0.67 (0.08)	0.01	0.70 (0.04)	0.009	0.64 (0.07)	0.11
		50	500	100	mad + scale	DL	0.68 (0.05)	0.01	0.68 (0.08)	0.01	0.70 (0.06)	0.002	0.65 (0.09)	0.03
		100	500	100	mad + scale	DL	0.55 (0.05)	0.2	0.44 (0.17)	0.27	0.57 (0.1)	0.37	0.37 (0.22)	0.24
	Number of hidden nodes	10	500	25	mad + scale	DL	0.66 (0.07)	0.03	0.67 (0.06)	0.06	0.65 (0.07)	0.03	0.60 (0.08)	0.14
		10	500	50	mad + scale	DL	0.69 (0.08)	0.01	0.68 (0.08)	0.015	0.69 (0.07)	0.007	0.65 (0.07)	0.07
		10	500	150	mad + scale	DL	0.66 (0.08)	0.05	0.67 (0.03)	0.02	0.68 (0.07)	0.02	0.64 (0.06)	0.08
	pre-processing	10	500	100	feature ranking	DL	0.68 (0.07)	0.007	0.67 (0.07)	0.02	0.68 (0.06)	0.03	0.65 (0.07)	0.05
		10	500	100	scale only	DL	0.70 (0.08)	0.004	0.68 (0.06)	0.01	0.69 (0.05)	0.009	0.64 (0.06)	0.14
		10	500	100	mad only	DL	0.69 (0.07)	0.008	0.69 (0.07)	0.006	0.65 (0.09)	0.03	0.67 (0.07)	0.04
							cross-validation p-value (10CV)					Full model
		Epoch	Additional hidden layer shape1	Bottleneck layer shape2	Normalization	Experiment	LIRI-JP p-value	NCI p-value	E-TABM p-value	Chinese	Hawaiian	LIRI-JP p-value	LIRI-JP C-index	NCI p-value	NCI C-index	E-TABM p-value	E-TABM C-index	Chinese p-value	Chinese C-index	Hawaiian p-value	Hawaiian C-index
	Used hyper-parameters	10	500	100	mad + scale	DL	0.0005	0.008	0.14	0.09	0.49	0.00044	0.75	0.00105	0.67	0.056	0.77	0.000849	0.69	0.1	0.82
	Hidden layers	10	-	100	mad + scale	DL	5e-05	0.02	0.35	0.07	0.31	0.001	0.77	0.01	0.66	0.007	0.73	0.001	0.7	0.71	0.47
		10	500, 250,	100	mad + scale	DL	5e-05	0.009	0.2	0.08	0.47	0.0002	0.72	0.03	0.62	0.17	0.68	0.0166	0.6	0.4	0.68
		10	500, 250, 125	100	mad + scale	DL	7e-05	0.13	0.2	0.15	0.52	0.0003	0.74	0.17	0.58	0.44		0.05	0.68	0.5	0.86
	Alternative approaches5	N/A	N/A	37(6)	mad + scale	CoxPH	0.32	0.31 + 7 N/A	0.30 + 5 N/A	0.30 + 5 N/A	0.53	0.3	0.59	N/A	N/A	N/A	N/A	0.18	N/A	0.51	N/A
		N/A	N/A	100	mad + scale	PCA	0.06	0.61 + 9 N/A	0.41 + 9 N/A	0.23	0.23 + 3 N/A	0.004	0.71	N/A	N/A	N/A	N/A	N/A	N/A	0.22	0.5
	Number of epochs	1	500	100	mad + scale	DL	0.0001	0.076	0.21	0.12	0.64	7e-06	0.8	0.05	0.62	0.005	0.82	0.26	0.6	0.71	0.82
		50	500	100	mad + scale	DL	7e-05	0.018	0.28	0.13	0.56	0.001	0.7	0.01	0.66	0.71	0.53	0.16	0.67	0.79	0.46
		100	500	100	mad + scale	DL	0.56	0.46 + 8 N/A	0.45 + 6 N/A	0.53 + 5 N/A	0.55	0.89	0.59	N/A	N/A	N/A	N/A	0.07	0.65	0.45	0.35
	Number of hidden nodes	10	500	25	mad + scale	DL	0.001	0.1	0.5	0.09	0.45	0.002	0.69	0.67	0.52	0.01	0.83	0.14	0.63	0.71	0.48
		10	500	50	mad + scale	DL	0.0005	0.03	0.14	0.09	0.48	0.003	0.7	0.93	0.5	0.16	0.69	0.27	0.45	0.79	0.54
		10	500	150	mad + scale	DL	0.0002	0.022	0.13	0.17	0.67	0.03	0.66	0.01	0.65	0.07	0.72	0.26	0.62	0.79	0.54
	pre-processing	10	500	100	feature ranking	DL	0.004	0.05	0.30 + 1 N/A	0.35	0.29	1e-05	0.8	0.001	0.67	0.51	0.62	0.86	0.5	0.59	0.63
		10	500	100	scale only	DL	0.0001	0.05	0.13	0.04 + 1 N/A	0.5	0.0004	0.75	0.001	0.68	0.1	0.77	0.0008	0.7	0.053	0.82
		10	500	100	mad only	DL	0.0009	0.04	0.17	0.02	0.55	0.003	0.72	0.001	0.65	0.92	0.53	0.005	0.66	0.07	0.81
	Footnotes	1	The shape represents the number and the size of the hidden layers for the encoder. i.e. 500 represents a hidden layer of 500 nodes for both the encoder and decoder.
		2	Number of nodes for the bottleneck layer used as new features
		3	for the c-index value, both mean and std are given
		4	p-value given for CV experiments is the geometric mean of the 10 p-value
		5	The alternative approaches are alternative to the autoencoder to compute new features which are then used in the exact same pipeline that is used for the DL method
		6	In that case, this number is equal to the number of top features selected
		7	"all significant" alternative approach select ALL feature significantly linked with survival (using Cox-PH model)
		8	N/A for CV experiments represents the number of fold for which only one class is inferred (no p-value can be computed).
