# Supplementary material for: Deep Learning–Based Multi-Omics Integration Robustly Predicts Survival in Liver Cancer
Source: Oxford University Press journal article supplement (doi:10.1158/1078-0432.ccr-17-0853), 2017-10-05
Supplement: 10780432ccr170853-sup-180979_3_supp_4273554_lwhf1l.docx [file 10780432ccr170853-sup-180979_3_supp_4273554_lwhf1l.docx]

**Supplementary File S2**

**Supplementary File S2: Description of results on differential tests of miRNAs and methylation.**

As a result, 16 miRNAs were found up-regulated in aggressive subtype S1 and 7 were found down-regulated after the filtering criteria mentioned in Methods section **(**Supplementary Figure S2A**)**. miR-200a, miR-200b, miR-200c, miR-141, and miR-429 (members of hsa-200 family) stand out as being up-regulated in aggressive S1 subtype. Interestingly, upregulation of miR-200 was reported to be associated with high risk in glioblastoma patients with poor survival (1). Among the miRNAs that are overexpressed in S1, miR-34c and miR-183 have been found upregulated in cluster S1 in our study and have been reported to be potentially associated with HCC in the other studies (2,3).

55 genes had averaged M value difference greater than 1 and adjusted p-value <0.05 (Supplementary Figure S2B). Interestingly, multiple small nucleolar RNA family genes (*SNORD22*, *SNORD44*, *SNORD77*, *SNORD78*, *SNORD79*, *SNORD80* and *SNORD87*) have been found hypomethylated in aggressive subtype S1, along with *GLRX*, *EID3*, *TMEFF1* and *CYBA*. *SNORD44* has been identified as the housekeeping gene in colon cell line HCT-116 (4). Over expression of *SNORD78* is reported to be associated with poor prognosis in HCC (5). 44 genes were hypermethylated in S1 subtype. Among them, the ones with high averaged difference include *RAPGEF2*, *OR9I1*, *KRTAP2-2*, *SERPINC1*, *OR9Q1*, *ZNF366* and *TREML4*. *RAPGEF2* (Rap Guanine Nucleotide Exchange Factor 2) is instrumental in RAS activation (6), though no direct evidence of its methylation was previously reported in HCC. *SERPINC1* was reported to be downregulated in the HCC and was among the gene signatures that discriminates high-risk group from the low-risk group (7).

1. Srinivasan S, Patric IR, Somasundaram K. A ten-microRNA expression signature predicts survival in glioblastoma. PLoS One 2011;6(3):e17438.

2. Chen X, Yan GY. Semi-supervised learning for potential human microRNA-disease associations inference. Sci Rep 2014;4:5501.

3. Li J, Fu H, Xu C, Tie Y, Xing R, Zhu J*, et al.* miR-183 inhibits TGF-beta1-induced apoptosis by downregulation of PDCD4 expression in human hepatocellular carcinoma cells. BMC Cancer 2010;10:354.

4. Morata-Tarifa C, Picon-Ruiz M, Grinan-Lison C, Boulaiz H, Peran M, Garcia MA*, et al.* Validation of suitable normalizers for miR expression patterns analysis covering tumour heterogeneity. Sci Rep 2017;7:39782.

5. Ma P, Wang H, Han L, Jing W, Zhou X, Liu Z. Up-regulation of small nucleolar RNA 78 is correlated with aggressive phenotype and poor prognosis of hepatocellular carcinoma. Tumour Biol 2016

6. Rebhun JF, Castro AF, Quilliam LA. Identification of guanine nucleotide exchange factors (GEFs) for the Rap1 GTPase. Regulation of MR-GEF by M-Ras-GTP interaction. J Biol Chem 2000;275(45):34901-8.

7. Kim JW, Ye Q, Forgues M, Chen Y, Budhu A, Sime J*, et al.* Cancer-associated molecular signature in the tissue samples of patients with cirrhosis. Hepatology 2004;39(2):518-27.
